# Supplementary material for: Did the Bronze Age deforestation of Europe affect its climate? A regional climate-model study using pollen-based land-cover reconstructions
Source: Copernicus journal article supplement (doi:10.5194/cp-2023-17), 2023-03-31
Supplement: Supplementary file [file cp-2023-17-AC1-supplement.pdf]

## Appendix A

### Did the Bronze Age deforestation of Europe affect its climate? A regional climate-model study using pollen-based land-cover reconstructions. Strandberg et al., 2023

**Table A1** Groups of land-cover types used in this study. Ericaceae\*(MTSE): the pollen productivity used for Ericaceae pollen in the REVEALS reconstruction represents the mean pollen productivity of several species of which *Arbutus unedo*, *Erica arborea*, *E. cinerea* and *E. multiflora* are dominant. The genus *Calluna vulgaris* (heather, LSE) also belongs to the Ericaceae family but its pollen productivity has been estimated separately (Githumbi et al., 2021). Cerealia t.: all cereals except *Secale cereale* (rye) that is easily that is easily separated on the basis of pollen morphology and for which pollen productivity was estimated separately. Abbreviation: t = type. of land-cover types (LCTs) and Plant Functionnal Types (PFTs) used in this study. \*\*The most recent plant taxonomy has merged the family Chenopodiaceae into the family Amaranthaceae, i.e. "new" Amaranthaceae = "former" Amaranthaceae + Chenopodiaceae. Pollen analysts have mostly used the name Chenopodiaceae for this pollen-morphological type, but it includes all species from the two former families, therefore the name Amaranthaceae/Chenopodiaceae.

| Land-cover                      |      |                                                  |                            | Plant                                                  | taxa/Pollen- |
|---------------------------------|------|--------------------------------------------------|----------------------------|--------------------------------------------------------|--------------|
| types (LCTs)                    | PFT  | PFT definition                                   |                            | morphological types                                    |              |
|                                 | TBE1 | Shade-tolerant evergreen trees                   |                            | <i>Picea abies</i> (Norway spruce)                     |              |
|                                 | TBE2 | Shade-tolerant evergreen trees                   |                            | <i>Abies alba</i> (Silver fir)                         |              |
|                                 | IBE  | Shade-intolerant evergreen trees                 |                            | <i>Pinus sylvestris</i> (Scots pine)                   |              |
|                                 |      |                                                  |                            | <i>Phillyrea</i> (mock privet)                         |              |
| Evergreen trees and shrubs (ET) | MTBE | Mediterranean evergreen trees                    | shade-tolerant broadleaved | <i>Pistacia</i> (lentisk, mastic)                      |              |
|                                 |      |                                                  |                            | <i>Quercus evergreen t.</i><br>(evergreen oak species) |              |
|                                 | TSE  | Tall shrub, evergreen                            |                            | <i>Juniperus communis</i> (common juniper)             |              |
|                                 | MTSE | Mediterranean broadleaved tall shrubs, evergreen |                            | <i>Ericaceae*</i> (heather family)                     |              |
|                                 |      |                                                  |                            | <i>Buxus sempervirens</i> (common)                     |              |

|                                    |     |                                     |                                                            |
|------------------------------------|-----|-------------------------------------|------------------------------------------------------------|
|                                    |     |                                     | box)                                                       |
|                                    |     |                                     | <i>Alnus glutinosa</i> (common alder)                      |
|                                    | IBS | Shade-intolerant summer-green trees | <i>Betula</i> (birch species)                              |
|                                    |     |                                     | <i>Carpinus betulus</i> (common hornbeam)                  |
|                                    |     |                                     | <i>Carpinus orientalis</i> (oriental hornbeam)             |
|                                    |     |                                     | <i>Castanea sativa</i> (sweet chestnut)                    |
| Summer-green trees and shrubs (ST) | TBS | Shade-tolerant summer-green trees   | <i>Corylus avellana</i> (common hazel)                     |
|                                    |     |                                     | <i>Fagus sylvatica</i> (European beech)                    |
|                                    |     |                                     | <i>Fraxinus</i> (ash species)                              |
|                                    |     |                                     | <i>Quercus deciduous</i> t. (summer-green oak species)     |
|                                    |     |                                     | <i>Tilia</i> (linden species)                              |
|                                    |     |                                     | <i>Ulmus</i> (elm species)                                 |
|                                    | TSD | Tall shrub, summer-green            | <i>Salix</i> (willow species (osier, sallow))              |
|                                    | LSE | Low shrub, broadleaved evergreen    | <i>Calluna vulgaris</i> (heather)                          |
|                                    |     |                                     | <i>Artemisia</i> (mugwort species)                         |
| Open land (OL)                     | GL  | Grassland - all herbs               | <i>Amaranthaceae</i> /<br><i>Chenopodiaceae</i> (amaranth) |

---

family/e.g. goosefoot\*\*)

---

*Cyperaceae* (sedges)

---

*Filipendula* (meadowseet)

---

*Poaceae* (grass family)

---

*Plantago lanceolata* (ribwort  
plantain)

---

*Rumex acetosa-t* (common  
sorrel and some other Rumex  
(dock) species)

---

*Cerealia-t* (all cereals except

---

AL      Agricultural land - cereals

*Secale cereale* (rye))

---

*Secale cereale* (rye)

---

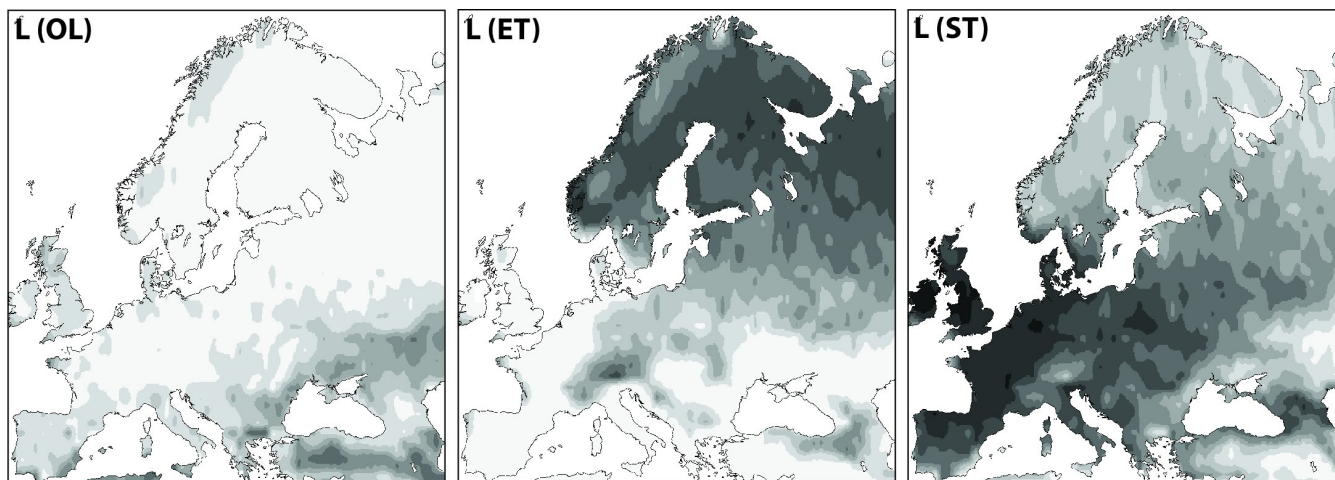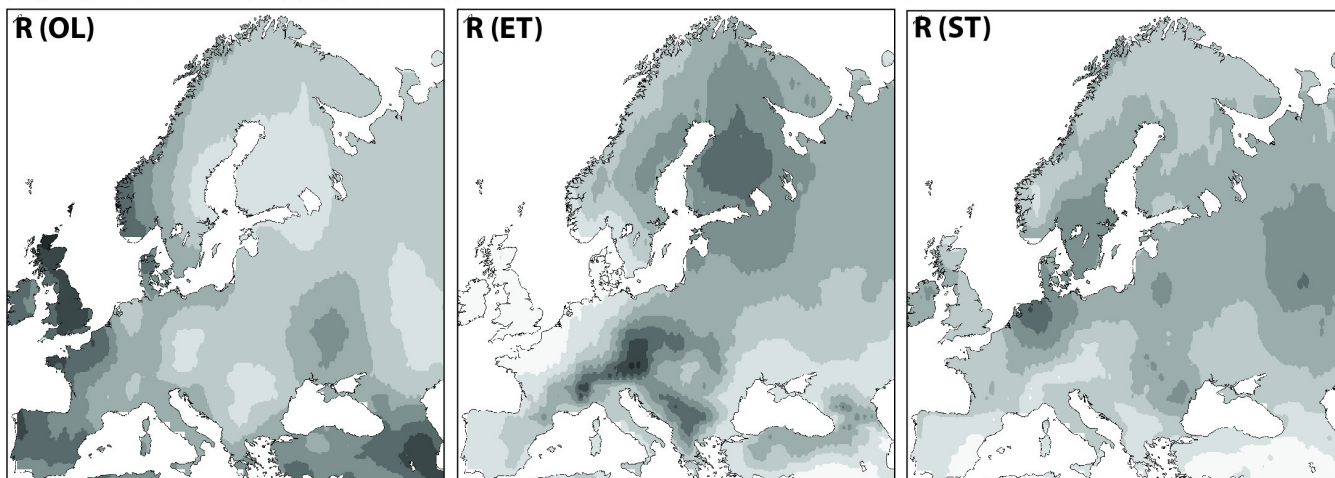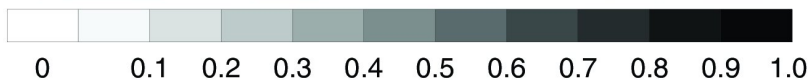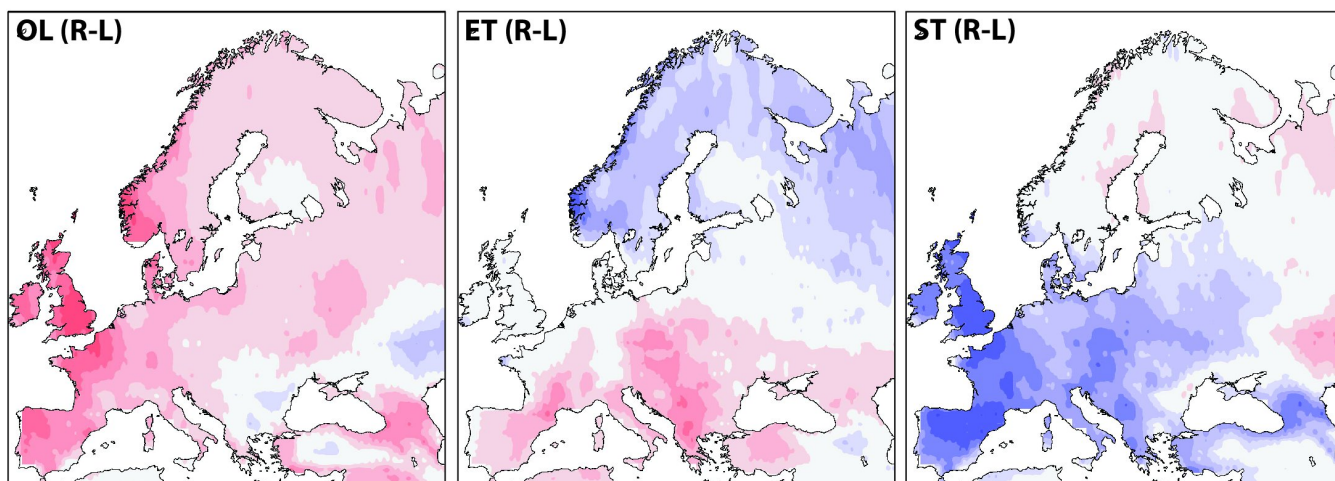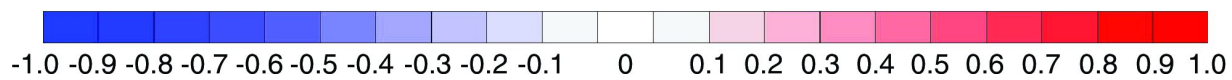

10 **Fig A1 Upper panels: Cover (in fraction of grid cell) of open land (OL), evergreen trees (ET), and summer-green trees (ST) at 2.5 ka in Europe as, first row: simulated by LPJ-GUESS using climate input from EC-Earth (L), and second row: estimated using pollen data and the REVEALS model (R). Lower panels: Difference between L and R cover (R-L). See main text under methods and results for details.**
