# Supplementary material for: Did the Bronze Age deforestation of Europe affect its climate? A regional climate-model study using pollen-based land-cover reconstructions
Source: Copernicus journal article supplement (doi:10.5194/cp-2023-17), 2023-03-31
Supplement: Supplementary file [file cp-2023-17-AC2-supplement.pdf]

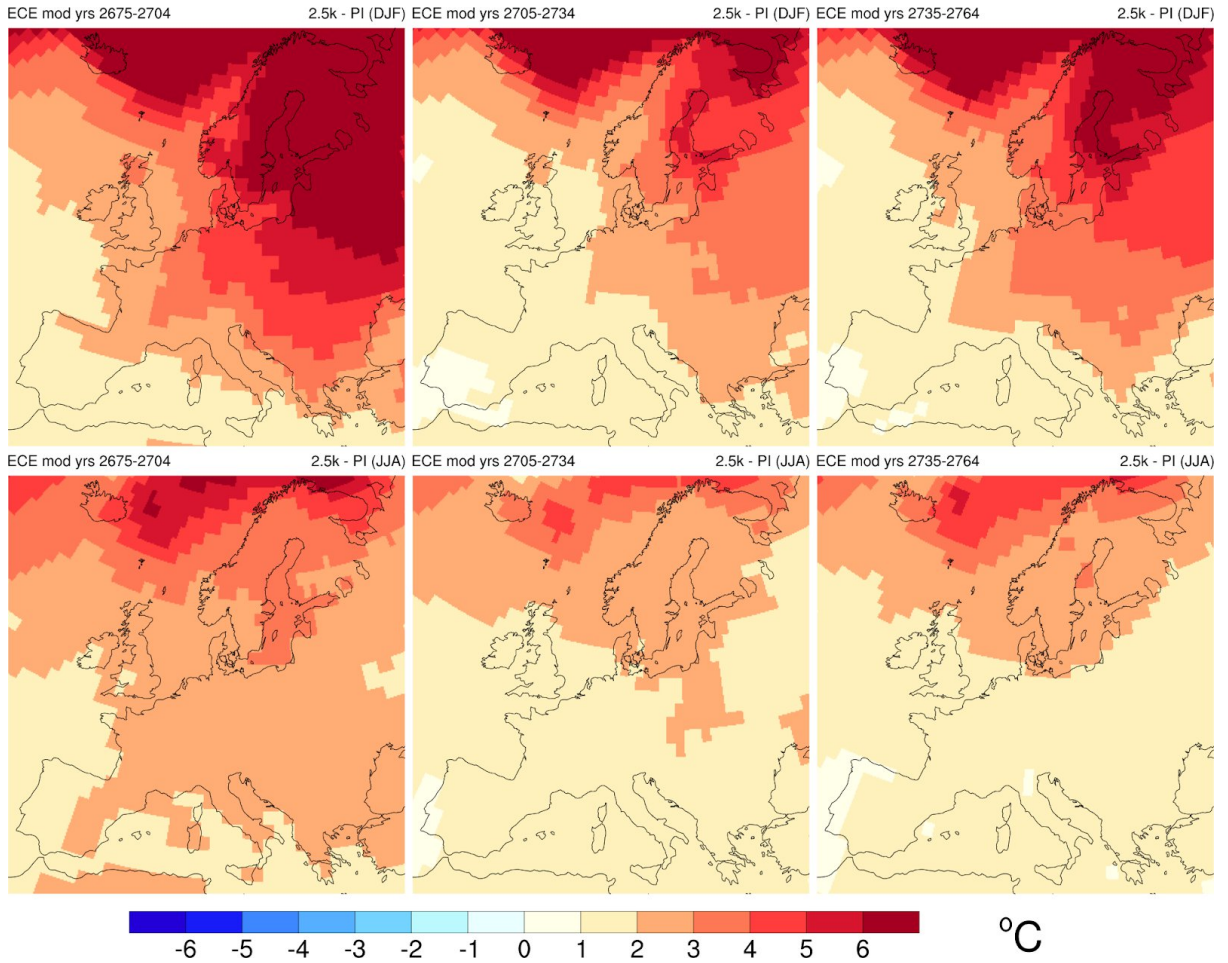

Temperature difference ( $^{\circ}\text{C}$ ) between 2.5 ka and PI ( $T_{2.5\text{k-R}} - \text{PI}$ ) for winter (DJF, top row) and summer (JJA, bottom row) as simulated by EC-Earth for three adjacent periods representing 2.5 ka.

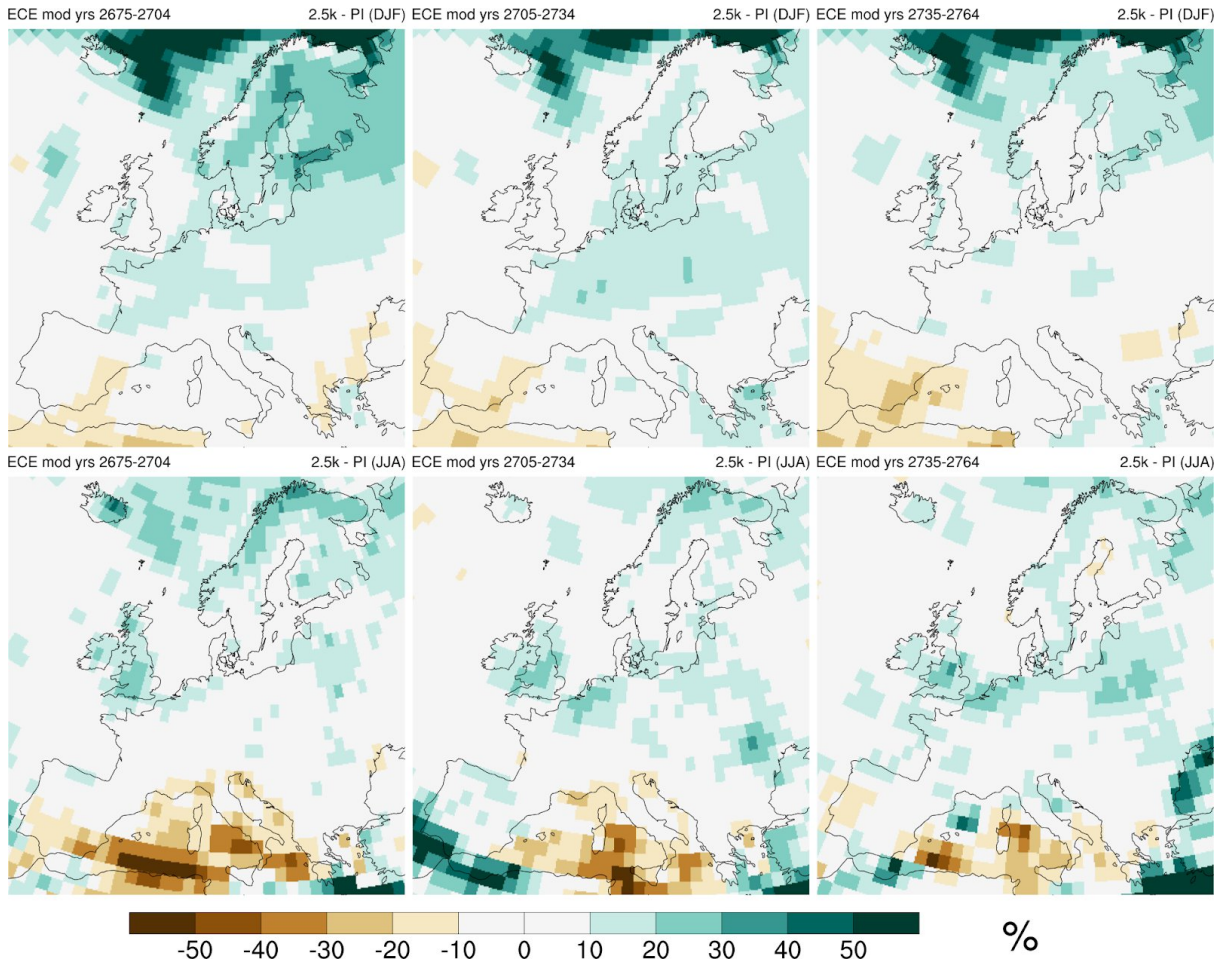

Precipitation difference (%) between 2.5 ka and PI ( $P_{2.5k-R} - PI$ ) for winter (DJF, top row) and summer (JJA, bottom row) as simulated by EC-Earth for three adjacent periods representing 2.5ka.
